# Supplementary material for: Psychosocial stress exacerbates doxorubicin-induced cardiotoxicity in adult C57BL/6N mice
Source: Research Square preprint supplement (doi:10.21203/rs.3.rs-8491866/v1), 2026-01-08
Supplement: Supplementary file 1 [file dc02d92fc4edd4d47f88359a.xlsx]

## Sheet: SHEET1_DEGs_Control vs DOX 
			Control Saline vs Control DOX
GENE	logFC	PValue	Differentiation
Sprr1a	3.87574	0.00253966	UP
Chil3	3.24868	4.83633e-05	UP
Gypa	3.09413	0.00133287	UP
ENSMUSG00000119972	3.0061	7.06423e-05	UP
F5	3.00143	0.000126183	UP
Apol11b	2.90845	0.000180332	UP
Treml1	2.85139	0.000295689	UP
Clec1b	2.7433	8.4325e-05	UP
Mfsd2b	2.68345	0.000840381	UP
S100a8	2.675	3.71449e-05	UP
Gp9	2.67106	0.000300895	UP
S100a9	2.67077	8.46536e-06	UP
Slc4a1	2.62919	0.000800945	UP
Ppbp	2.56408	0.000337852	UP
Tes3-ps	2.50411	0.000727854	UP
Itga2b	2.44641	3.22873e-05	UP
Gm45507	2.43269	0.00124186	UP
Cerkl	2.38188	0.00283925	UP
Gm47484	2.31188	0.000226627	UP
Trim10	2.1987	0.0168857	UP
Gm12295	2.10832	0.000700768	UP
Kcnq5	2.10255	0.000625572	UP
Gm47644	2.06665	6.40447e-05	UP
Mybl1	2.06505	0.00193379	UP
Zfp991	2.03889	0.00376068	UP
Gm13054	2.03586	0.00879995	UP
Gm43185	2.03538	0.00482672	UP
Nrgn	1.97186	0.00128766	UP
Zfp433	1.89832	0.00358532	UP
1700119I11Rik	1.89166	0.000126955	UP
Tubb1	1.84796	0.0127207	UP
Gm26631	1.81695	0.000114099	UP
I830077J02Rik	1.77727	0.000791151	UP
Slc6a4	1.77698	0.00489138	UP
Zfp977	1.75748	0.0102718	UP
Myh7	1.73738	0.00908867	UP
Ptgs2	1.71471	0.00062862	UP
Snca	1.71146	0.00782372	UP
ENSMUSG00000121134	1.6951	0.0349336	UP
Enkur	1.69492	0.0184693	UP
Gm20632	1.6761	9.9537e-05	UP
Malat1	1.65857	0.0336949	UP
ENSMUSG00000120126	1.65213	0.000135789	UP
Zfp982	1.6501	0.0224653	UP
Gm20008	1.63409	0.00329728	UP
Resf1	1.62641	0.0192973	UP
Gm30934	1.62483	0.00296473	UP
Zfp975	1.61847	0.0203635	UP
Glrb	1.6105	0.00412141	UP
Gm50341	1.5975	0.0122614	UP
4930506C21Rik	1.59614	0.000842082	UP
ENSMUSG00000121059	1.59293	0.00968421	UP
ENSMUSG00000120701	1.5895	0.000694344	UP
Znf41-ps	1.57811	0.00582503	UP
Pdzd9	1.57619	0.00845203	UP
Gm16685	1.56637	0.0263839	UP
Sh3rf3	1.56448	0.0026918	UP
Ms4a4a	1.55271	0.0111256	UP
Zfp268	1.5385	0.00395968	UP
Gm43361	1.53295	0.00129456	UP
Gm13217	1.51876	0.00488945	UP
Zfp54	1.51078	0.000724756	UP
Platr25	1.50659	0.0289932	UP
AI987944	1.49745	0.0100704	UP
Zfp808	1.49261	0.0337566	UP
Map3k15	1.48823	0.000710134	UP
Gm7072	1.48067	0.00471989	UP
Eda2r	1.46425	0.00011362	UP
Eif2s3y	1.45017	0.000500244	UP
Gm15469	1.44118	0.0102855	UP
Cdh19	1.43673	0.0155227	UP
Rgs18	1.4265	0.0223245	UP
Slitrk4	1.42582	0.0250162	UP
Ctla2a	1.41203	0.00019595	UP
Zfp119a	1.41154	0.00465571	UP
Plek	1.40494	0.00295278	UP
Rbm12b1	1.40352	0.000300371	UP
Ccdc88a	1.39505	0.0280463	UP
BC024063	1.3933	0.0339128	UP
Cep290	1.39017	0.0311111	UP
Htr2a	1.38956	0.00850248	UP
D3Ertd751e	1.38649	0.014921	UP
Fgf7	1.38384	0.0142652	UP
Zfp62	1.37747	0.0367066	UP
ENSMUSG00000120718	1.37336	0.000382371	UP
Neb	1.3729	0.019903	UP
Gm42208	1.36966	0.0342509	UP
Nr4a3	1.36188	0.00154888	UP
Zfp51	1.35638	0.0140619	UP
Zfp72	1.35611	0.0173913	UP
Ccdc173	1.35561	0.0328299	UP
Gm29686	1.35511	0.0153683	UP
Hectd2os	1.34819	0.00077389	UP
Gm31520	1.33974	0.000301208	UP
Zfp850	1.33904	0.0405419	UP
Kbtbd8	1.33113	0.0162166	UP
Gm16332	1.32769	0.0319807	UP
Neat1	1.31464	0.0141098	UP
Tmem184c	1.31324	0.0186534	UP
Hycc2	1.31118	0.022933	UP
Rbm3-ps	1.3068	0.000315854	UP
Gm40604	1.30566	0.00257116	UP
Gpr22	1.30226	0.019312	UP
Trpm7	1.30122	0.0313154	UP
0610025J13Rik	1.30087	0.0165132	UP
Acp5	-1.31647	0.0365475	DOWN
H2-Ob	-1.38295	0.0111755	DOWN
Gm17753	-1.39015	0.0144203	DOWN
Cxcl10	-1.42774	0.0071582	DOWN
Igtp	-1.44695	6.41621e-05	DOWN
Tcf7	-1.47045	0.010451	DOWN
Upk3b	-1.47526	0.0348315	DOWN
Pck1	-1.49524	0.00832746	DOWN
Runx3	-1.49629	0.00121439	DOWN
Ccl5	-1.51214	0.0157821	DOWN
Gbp10	-1.55234	0.0458039	DOWN
Rasgrp1	-1.5766	0.00803819	DOWN
Kap	-1.62791	0.0350686	DOWN
H2-DMb1	-1.63205	4.74587e-05	DOWN
Slamf8	-1.6599	0.00357326	DOWN
Serpina1d	-1.6612	0.0300456	DOWN
H2-DMa	-1.6832	1.02085e-06	DOWN
2310015K22Rik	-1.83228	0.000292935	DOWN
Igkc	-1.89446	0.000228135	DOWN
Serpina1b	-1.91495	0.017896	DOWN
Retnla	-1.97418	7.7426e-05	DOWN
Hpx	-1.99687	0.0146895	DOWN
Alb	-2.01935	0.0149603	DOWN
Angptl4	-2.02557	0.00207322	DOWN
H2-Aa	-2.03766	1.85191e-06	DOWN
Ciita	-2.04298	2.30547e-05	DOWN
Serpina1c	-2.0487	0.0211395	DOWN
Cd79b	-2.05927	6.13557e-05	DOWN
Gm12250	-2.06959	0.00171656	DOWN
Fcmr	-2.07488	3.09869e-05	DOWN
H2-Eb1	-2.15377	2.52389e-06	DOWN
Ighd	-2.19847	2.94034e-05	DOWN
H2-Ab1	-2.2219	1.41692e-06	DOWN
Dnase1l3	-2.25204	0.00365466	DOWN
Cd74	-2.27399	5.78183e-07	DOWN
Acsbg1	-2.31799	0.00176909	DOWN
Il2rb	-2.46909	1.83513e-05	DOWN
Cd79a	-2.47163	6.58606e-05	DOWN
F830016B08Rik	-2.60278	0.0132566	DOWN
BC023105	-2.96181	0.00413314	DOWN
Gm12185	-3.34499	0.00103014	DOWN
Gm4841	-4.52591	0.000299093	DOWN

## Sheet: SHEET3_DEGs_CSS vs CSS DOX
			CSS Saline vs CSS/DOX
GENE	logFC	PValue	Differentiation
Sprr1a	3.63754	0.000163564	UP
Clec1b	2.3895	0.0044228	UP
Star	2.31452	0.000756365	UP
mt-Atp8	2.30263	0.0226224	UP
Upb1	2.23927	0.00170997	UP
Slc4a1	2.16262	0.00295361	UP
Myh7	2.10011	0.0026623	UP
Chil3	2.099	0.000467362	UP
Tmem88b	2.00135	0.000107074	UP
Tent5b	1.93391	0.0145803	UP
F5	1.89309	0.0200315	UP
Dbp	1.88703	0.0016431	UP
Cyp1a1	1.87502	0.000109886	UP
S100a9	1.869	0.00046909	UP
Ciart	1.84001	5.06589659317941e-06	UP
S100a8	1.81771	0.0018793	UP
A2m	1.78814	0.00221622	UP
Gm31520	1.75926	1.48620362295538e-05	UP
Gypa	1.6566	0.0385685	UP
Rassf7	1.61549	0.0201993	UP
Per2	1.61374	0.000380334	UP
Apol11b	1.60947	0.0115989	UP
Ccn2	1.59135	0.000651043	UP
Nmrk2	1.58676	0.00179313	UP
Gcgr	1.54464	0.000805473	UP
Alas2	1.51481	0.00618767	UP
Gm30873	1.50539	0.00986829	UP
Clvs1	1.50272	0.000503765	UP
Ppil6	1.49161	0.00118675	UP
Gm16316	1.47813	0.000267277	UP
Hba-a2	1.47494	0.0024676	UP
Icam4	1.44882	0.00088514	UP
Gm45507	1.42737	0.0337667	UP
Kntc1	1.41677	0.0214708	UP
Lgals3	1.40866	0.00394427	UP
Per1	1.39846	8.028759841891e-05	UP
Gm17501	1.37283	0.00139116	UP
Tent5c	1.34099	0.00401708	UP
Snca	1.3397	0.0221103	UP
Arhgdig	1.32532	0.00262027	UP
Septin3	1.32333	0.00698555	UP
Ccl12	1.32193	0.0111963	UP
Enkur	1.31269	0.0242639	UP
Oas3	1.30498	0.00819137	UP
Pdk4	-1.3015	0.00593897	DOWN
Gm49331	-1.3037	0.0357593	DOWN
Gm50433	-1.30816	0.000920979	DOWN
Lamc3	-1.31733	0.0153822	DOWN
Cd79a	-1.33027	0.00604028	DOWN
Mboat1	-1.33423	0.000863674	DOWN
Nek2	-1.35704	0.00649267	DOWN
4930466K18Rik	-1.36755	0.0343658	DOWN
Gm16534	-1.41974	0.00815455	DOWN
Tmem171	-1.42437	8.19521411017547e-06	DOWN
Npas2	-1.46151	0.00285766	DOWN
Pimreg	-1.47074	0.0246209	DOWN
Foxm1	-1.47561	0.011455	DOWN
Gm42970	-1.48327	0.0485623	DOWN
Arsi	-1.50951	0.00153723	DOWN
Nhs	-1.52907	0.035	DOWN
Fut2	-1.5708	0.0131799	DOWN
Adamts4	-1.63282	0.0215494	DOWN
Kifc1	-1.6719	0.00250688	DOWN
Mmp13	-1.71007	0.000953981	DOWN
Col28a1	-1.94858	0.000435222	DOWN
Acta1	-2.03027	1.96014842985564e-05	DOWN
Fcmr	-2.29244	4.74191059386692e-05	DOWN
Gc	-2.30029	0.0359962	DOWN
Apoa1	-2.30783	0.0420357	DOWN
Alb	-2.35591	0.0127213	DOWN
Arntl	-2.59045	7.27557700870969e-05	DOWN
Angptl4	-2.63419	0.00022666	DOWN
Gnat3	-2.64324	0.000352982	DOWN
Fam124b	-2.76705	0.00180461	DOWN
Serpina1e	-2.83582	0.025249	DOWN
Hpx	-2.85946	0.0207638	DOWN
Serpina1c	-2.86001	0.0257336	DOWN
Serpina3k	-2.93067	0.0261258	DOWN
Mup3	-3.33591	0.0182426	DOWN
Mup7	-4.86284	0.00937504	DOWN

## Sheet: SHEET4_GSEA_Control vs DOX
Control Saline vs Control DOX
ID	setSize	enrichmentScore	NES	pvalue	p.adjust	qvalue	rank	leading_edge	core_enrichment	gene_set_database	gene_set_description
HALLMARK_INTERFERON_GAMMA_RESPONSE	181	-0.485794	-2.37202	1e-10	5e-09	3.47368e-09	1218	tags=29%, list=9%, signal=27%	Parp12/Dhx58/Rbck1/Ly6e/Il4ra/Oas2/Helz2/Xaf1/Ifi27/Ifi30/Wars1/Tapbp/Lgals3bp/B2m/Bst2/Lcp2/Trim14/Irf1/Psmb9/Tnfaip2/Irf9/H2-D1/Il10ra/Batf2/Oas3/Stat1/Auts2/Psmb8/Stat2/Itgb7/Irf5/Irf8/H2-Q7/Cd274/Cd40/Txnip/Ptpn6/Tap1/Zbp1/Cxcl9/Nlrc5/Irf4/Slamf7/Cxcl10/Ccl5/Gbp10/H2-DMa/H2-Aa/Ciita/H2-Eb1/Cd74/Il2rb	h	http://www.broadinstitute.org/gsea/msigdb/cards/H
HALLMARK_ALLOGRAFT_REJECTION	138	-0.497732	-2.34571	2.92764e-10	7.31909e-09	5.08484e-09	1541	tags=36%, list=11%, signal=32%	Fyb/Traf2/Psmb10/Egfr/Ifngr2/Igsf6/Itgb2/H2-T23/Il4ra/Csk/Wars1/Apbb1/Tapbp/Il2rg/Stab1/Mmp9/B2m/Spi1/Lcp2/Was/Prkcb/Tlr1/Il27ra/Hcls1/Gbp2/Stat1/Thy1/Irf8/Ncf4/H2-Q7/Nos2/Cd4/Gpr65/Ly86/Cd40/Ptpn6/Tap1/Il16/Cxcl9/Irf4/Cd247/H2-Ob/Ccl5/H2-DMb1/H2-DMa/H2-Aa/Cd74/Il2rb/Cd79a	h	http://www.broadinstitute.org/gsea/msigdb/cards/H
HALLMARK_INTERFERON_ALPHA_RESPONSE	93	-0.457414	-2.02194	9.15694e-06	0.000152616	0.000106028	2078	tags=37%, list=15%, signal=31%	Epsti1/Tmem140/Procr/Ifitm3/Cmtr1/Irf7/Trim26/Parp12/Dhx58/Ly6e/Il4ra/Helz2/Ifi27/Ifi30/Wars1/Oas1a/Lgals3bp/Mov10/B2m/Bst2/Trim14/Irf1/Psmb9/Irf9/Batf2/Gbp2/Psmb8/Uba7/Stat2/H2-Q7/Txnip/Tap1/Cxcl10/Cd74	h	http://www.broadinstitute.org/gsea/msigdb/cards/H
HALLMARK_APICAL_JUNCTION	163	-0.352071	-1.69509	6.03915e-05	0.000754894	0.000524452	3468	tags=44%, list=25%, signal=33%	Tgfbi/Mapk11/Parva/Taok2/Nectin2/Actn4/Icam2/Rras/Ldlrap1/Cd86/Cap1/Shc1/Cx3cl1/Dhx16/Pbx2/Pfn1/Cd34/Vasp/Actn1/Map4k2/Cdh4/Ctnnd1/Amigo1/Mpzl1/Itga3/Flnc/Nrtn/Speg/Plcg1/Actc1/Hadh/Adam15/Bmp1/Adam23/Sorbs3/Pkd1/Fyb/Sirpa/Egfr/Fbn1/Pcdh1/Jup/Tmem8b/Myl12b/Crat/Inppl1/Nectin4/Mapk14/Itga9/Sdc3/Actg1/Actg2/Itga10/Cercam/Vav2/Mmp9/Myh9/Adra1b/Actb/Col16a1/Gamt/Cd276/Acta1/Thy1/Nrxn2/Cldn15/Cd274/Cl…	h	http://www.broadinstitute.org/gsea/msigdb/cards/H
HALLMARK_HEME_METABOLISM	168	0.429381	1.64	0.000262755	0.00262755	0.00182546	2056	tags=21%, list=15%, signal=18%	Gypa/Slc4a1/Trim10/Snca/Alas2/Tent5c/Hbb-bt/Kdm7a/Cir1/Dcun1d1/Ell2/Nek7/Mospd1/Cdc27/Gclm/Bpgm/Spta1/Tfdp2/Abcg2/Usp15/Btg2/E2f2/Slc30a1/Gmps/Lamp2/Bach1/Nnt/Top1/Kat2b/Picalm/Tcea1/Car2/Nr3c1/Slc22a4/Mkrn1	h	http://www.broadinstitute.org/gsea/msigdb/cards/H
HALLMARK_MYOGENESIS	178	-0.328491	-1.60256	0.000351647	0.00293039	0.00203585	4370	tags=54%, list=32%, signal=37%	Svil/Pfkm/Fxyd1/Rit1/Efs/Itgb4/Ocel1/Prnp/Myh11/Flii/Reep1/Ephb3/Plxnb2/Tpm2/Itgb5/Casq1/Cav3/Atp6ap1/Large1/Ckm/Dapk2/Hrc/Kifc3/Mylk/Mb/App/Slc6a8/Pcx/Chrnb1/Pygm/Ldb3/Adcy9/Gja5/Hspb2/Ak1/Cryab/Tpm3/Igfbp7/Pgam2/Pick1/Sh2b1/Pdlim7/Cox6a2/Psen2/Sptan1/Tagln/Fabp3/Cox7a1/Cdh13/Dmpk/Myl4/Hdac5/Speg/Syngr2/Itga7/Mapre3/Pde4dip/Ptgis/Gsn/Actc1/Smtn/Tgfb1/Gaa/Gadd45b/Ptp4a3/Sorbs3/Ctf1/Lpin1/Hspb8/Ca…	h	http://www.broadinstitute.org/gsea/msigdb/cards/H
HALLMARK_PROTEIN_SECRETION	92	0.463235	1.64917	0.00145938	0.0091211	0.00633676	4157	tags=46%, list=30%, signal=32%	Rps6ka3/Tmx1/Yipf6/Arfip1/Snx2/Rab5a/Vps4b/Dnm1l/Bet1/Bnip3/Lamp2/Snap23/Arfgef1/Cln5/Adam10/Anp32e/Cav2/Tpd52/Tmed2/Uso1/Sgms1/Atp7a/Ap3s1/Clcn3/Arcn1/Rab9/Rab2a/Stx12/Vamp4/Stx7/Atp6v1h/Scamp1/Sec22b/Napg/Galc/Rab14/Pam/Kif1b/Rer1/Tom1l1/Abca1/Stam	h	http://www.broadinstitute.org/gsea/msigdb/cards/H
HALLMARK_INFLAMMATORY_RESPONSE	142	-0.336712	-1.58842	0.0012857	0.0091211	0.00633676	1123	tags=19%, list=8%, signal=18%	Ly6e/Ccl24/Il4ra/Ldlr/Axl/Tapbp/Stab1/Scarf1/Bst2/Lcp2/Adgre1/Serpine1/Irf1/Il10ra/Cd14/Tlr1/Gna15/P2rx7/Pik3r5/Cd40/Aplnr/Cxcl9/Ebi3/Cxcl10/Ccl5/Rasgrp1/Il2rb	h	http://www.broadinstitute.org/gsea/msigdb/cards/H
HALLMARK_MYC_TARGETS_V1	194	0.378537	1.46335	0.00465418	0.0258566	0.0179635	4863	tags=41%, list=35%, signal=27%	Dek/Vbp1/Npm1/Ssb/Eif2s2/Psmc6/Syncrip/Acp1/Cbx3/Prps2/Eif3j1/Snrpb2/Xpo1/Usp1/Ssbp1/Srsf1/Etf1/Abce1/Eif3j2/Orc2/Srsf3/Gnl3/Hnrnpa3/Cnbp/Srsf7/Ifrd1/Set/Eif2s1/Ptges3/Hnrnpa1/Serbp1/Nap1l1/Hdac2/Cul1/Tomm70a/Rsl1d1/Eif1ax/Tra2b/Dhx15/Snrpd1/Snrpa1/Psmd14/Ap3s1/Hnrnpa2b1/Hnrnpr/Kpna2/Tardbp/Cct4/Hnrnpd/Ube2e1/Pole3/Odc1/Pcna/Hnrnpu/Hddc2/Ddx21/Eif4e/Nme1/Snrpg/Pwp1/Gspt1/Eef1b2/Rpl22/Pabpc1/Snrpd…	h	http://www.broadinstitute.org/gsea/msigdb/cards/H
HALLMARK_EPITHELIAL_MESENCHYMAL_TRANSITION	178	-0.282279	-1.37711	0.00681087	0.0340544	0.0236588	2119	tags=28%, list=15%, signal=24%	Lrp1/Pcolce/Gpc1/Loxl1/Lamc1/Gas1/Eno2/Fn1/Ecm1/Notch2/Tgfb1/Col8a2/Bmp1/Gadd45b/Fbn1/Aplp1/Mest/Col5a2/Pdgfrb/Msx1/Bgn/Fmod/Pthlh/Anpep/Eln/Plod1/Tnc/Foxc2/Col5a1/Loxl2/Col1a2/Sparc/Serpinh1/Col12a1/Col3a1/Cd59b/Col6a3/Acta2/Sdc1/Col6a2/Fzd8/Serpine1/Col1a1/Col4a2/Col4a1/Fbln1/Col16a1/Thy1/Col5a3/Basp1	h	http://www.broadinstitute.org/gsea/msigdb/cards/H
HALLMARK_APICAL_SURFACE	33	-0.478197	-1.69803	0.0100709	0.041962	0.0291525	3458	tags=48%, list=25%, signal=36%	App/Slc2a4/Ephb4/Cx3cl1/Afap1l2/Crocc/Gas1/Flot2/Scube1/Hspb1/Crybg1/Tmem8b/Il2rg/Thy1/Mdga1/Il2rb	h	http://www.broadinstitute.org/gsea/msigdb/cards/H
HALLMARK_IL6_JAK_STAT3_SIGNALING	68	-0.371933	-1.54705	0.0092545	0.041962	0.0291525	685	tags=29%, list=5%, signal=28%	Bak1/Csf2ra/Tgfb1/Acvrl1/Ifngr2/Il4ra/Il2rg/Pdgfc/Tnfrsf21/Irf1/Il3ra/Irf9/Cd14/Crlf2/Stat1/Pik3r5/Stat2/Cxcl9/Ebi3/Cxcl10	h	http://www.broadinstitute.org/gsea/msigdb/cards/H
HALLMARK_ESTROGEN_RESPONSE_LATE	152	-0.282129	-1.34357	0.0181818	0.0699301	0.048583	1830	tags=22%, list=13%, signal=20%	Myof/Itpk1/Top2a/Slc29a1/Hspb8/Ret/Farp1/Mest/Slc22a5/Flnb/Cdc6/Ppif/Olfm1/Gins2/Fkbp4/Plxnb1/Cxcl14/Scarb1/Hr/Rps6ka2/Aldh3b1/Serpina3c/Acox2/Dhcr7/Dlg5/Gper1/Impa2/Hmgcs2/Igsf1/Ptpn6/Gale/Serpina1e/Serpina3k/Serpina1b	h	http://www.broadinstitute.org/gsea/msigdb/cards/H

## Sheet: SHEET6_GSEA_CSS vs CSS DOX
				CSS Saline vs CSS/DOX
ID	setSize	enrichmentScore	NES	pvalue	p.adjust	qvalue	rank	leading_edge	core_enrichment	gene_set_database	gene_set_description
HALLMARK_TNFA_SIGNALING_VIA_NFKB	169	0.519473	2.14014	5.57202e-09	2.78601e-07	1.81824e-07	1288	tags=30%, list=9%, signal=27%	Per1/Ier3/Bhlhe40/Ccl2/Phlda1/Cebpd/Nr4a1/Cebpb/Clcf1/Junb/Plaur/Pfkfb3/Egr3/Panx1/Socs3/Irs2/Fos/Sphk1/Ier5/Trib1/Csf1/Dusp4/Ccl5/Gadd45b/Cdkn1a/Zc3h12a/Icosl/Ptx3/Sdc4/Id2/Icam1/Gfpt2/F3/Nr4a3/Btg2/Tnc/Btg3/Dusp5/Gpr183/Tap1/Inhba/Ppp1r15a/Slc2a3/Serpine1/Cd80/Ptgs2/B4galt1/Hbegf/Lamb3/Serpinb8	h	http://www.broadinstitute.org/gsea/msigdb/cards/H
HALLMARK_G2M_CHECKPOINT	176	-0.490348	-1.9887	5.03358e-07	1.2584e-05	8.21269e-06	1426	tags=23%, list=10%, signal=21%	Slc12a2/Srsf10/Atrx/Mtf2/Birc5/E2f1/Cul5/Incenp/Prim2/Chek1/Nusap1/E2f3/Wrn/Casp8ap2/Cdc20/Sqle/Prpf4b/Kif11/Dmd/Brca2/Kif23/Cks2/Polq/Plk4/Marcks/Aurka/Egf/Smc2/Tpx2/Plk1/Racgap1/Hmmr/Top2a/Ccnf/Ccna2/Cdk1/Prc1/Kif22/Ccnb2/Nek2/Pbk	h	http://www.broadinstitute.org/gsea/msigdb/cards/H
HALLMARK_XENOBIOTIC_METABOLISM	157	0.473016	1.93197	1.59066e-06	2.6511e-05	1.73019e-05	2601	tags=38%, list=19%, signal=31%	Upb1/Cyp1a1/Mt2/Tgfb2/Slc6a6/Ddc/Ephx1/Cda/Gnmt/Aldh3a1/Slc1a5/Id2/Bcat1/Atoh8/Cdo1/Spint2/Hmox1/Cyp2e1/Slc22a1/Tmem176b/Gcnt2/Itih4/Aldh2/Gss/Slc12a4/Nqo1/Serpine1/Gsta1/Lpin2/Fah/Cndp2/Pink1/Slc35b1/Igfbp4/Maoa/Ccl25/Hes6/Sertad1/Gstt2/Por/Ddah2/Shmt2/Acp2/Smox/Comt/Fbln1/Dcxr/Car2/Pmm1/Ddt/Tnfrsf1a/Asl/Acox1/Apoe/Acp1/Hsd11b1/Aco2/Psmb10/Mthfd1	h	http://www.broadinstitute.org/gsea/msigdb/cards/H
HALLMARK_HEME_METABOLISM	168	0.446821	1.83995	9.42132e-06	0.000117766	7.68581e-05	711	tags=11%, list=5%, signal=10%	Slc4a1/Trim10/Gypa/Alas2/Icam4/Tent5c/Snca/E2f2/Hbb-bt/Nnt/Bpgm/C3/Fbxo9/Slc6a9/Myl4/Slc2a1/Ucp2/Btg2	h	http://www.broadinstitute.org/gsea/msigdb/cards/H
HALLMARK_MITOTIC_SPINDLE	185	-0.44495	-1.81699	1.27308e-05	0.000127308	8.30852e-05	1676	tags=23%, list=12%, signal=21%	Katna1/Cep250/Als2/Pcm1/Ppp4r2/Smc3/Myh9/Nck2/Tubgcp5/Birc5/Arhgap5/Incenp/Arfgef1/Ccdc88a/Nin/Hook3/Nusap1/Arhgap4/Clasp1/Anln/Nedd9/Myo1e/Cep192/Cd2ap/Kif11/Fscn1/Brca2/Kif23/Cntrl/Fgd4/Cenpj/Marcks/Aurka/Alms1/Tpx2/Plk1/Racgap1/Top2a/Cdk1/Prc1/Kif22/Ccnb2/Nek2	h	http://www.broadinstitute.org/gsea/msigdb/cards/H
HALLMARK_P53_PATHWAY	183	0.40726	1.69279	0.000113315	0.000944291	0.000616274	3293	tags=38%, list=24%, signal=30%	Ier3/Tnni1/Alox8/Ephx1/Trp63/Zfp365/Phlda3/Ddb2/Fos/Sphk1/H1f2/Ier5/Zbtb16/Procr/Cdkn1a/Eps8l2/Btg2/Cdk5r1/Hmox1/Tap1/Osgin1/Prmt2/Trib3/Foxo3/Plxnb2/Bax/Ppp1r15a/Irag2/Rrp8/Rgs16/Tspyl2/Hbegf/Nupr1/Slc3a2/Fuca1/Atf3/Sfn/Perp/Vdr/Dcxr/Ppm1d/Vamp8/Hint1/Pmm1/Rack1/Abhd4/Rps27l/Tgfa/Vwa5a/Mapkapk3/Pdgfa/Abat/Rps12/Rpl36/Wrap73/Ifi30/Sec61a1/Zmat3/Ptpn14/Fgf13/Tax1bp3/Traf4/Plk2/Ndrg1/Cd82/Cebpa/Slc…	h	http://www.broadinstitute.org/gsea/msigdb/cards/H
HALLMARK_UV_RESPONSE_UP	137	0.401644	1.60951	0.000718285	0.00513061	0.0033484	3205	tags=35%, list=23%, signal=27%	Cyp1a1/Nr4a1/Ephx1/Junb/Pdlim3/Sult1a1/Fos/Gpx3/Eno2/Kcnh2/Prkcd/H2-M3/Bid/Icam1/Amd1/Btg2/Cdo1/Btg3/Hmox1/Tap1/Msx1/Stard3/Maoa/Stk25/Rpn1/Atf3/Ppat/Tuba4a/Selenow/Dgat1/Polr2h/Car2/Hspa2/Sqstm1/Aldoa/Olfm1/Irf1/Ntrk3/Cltb/Shox2/Arrb2/H2ax/Tgfbrap1/Mrpl23/Grina/Dnajb1/Prpf3/Rab27a	h	http://www.broadinstitute.org/gsea/msigdb/cards/H
HALLMARK_HYPOXIA	175	0.385704	1.5951	0.00113072	0.007067	0.00461215	1142	tags=20%, list=8%, signal=19%	Ccn2/Ier3/Plac8/Bhlhe40/Mt2/Slc6a6/Pdk3/Plaur/Pfkfb3/Noct/Igfbp3/Cp/Stbd1/Irs2/Fos/Isg20/Cdkn1a/Eno2/Hk1/Sdc4/Slc2a1/F3/Ccn5/Hmox1/Pfkp/Hspa5/Gcnt2/Mif/Foxo3/Ppp1r15a/Slc2a3/Pgf/Serpine1/Lox/Pck1	h	http://www.broadinstitute.org/gsea/msigdb/cards/H
HALLMARK_E2F_TARGETS	176	-0.390906	-1.58539	0.00132088	0.00733824	0.00478917	1772	tags=27%, list=13%, signal=24%	Rad51c/Rad50/Luc7l3/Rfc1/Nbn/Rpa3/Espl1/Xpo1/Shmt1/Dek/Ube2t/Cdc25a/Gins3/Rrm2/Hmgb2/Ing3/Mthfd2/Dctpp1/Smc3/Tk1/Asf1b/Birc5/Atad2/Prim2/Ipo7/Chek1/Chek2/Cdc20/Timeless/Spc25/Ung/Tfrc/Spc24/Brca2/Cdca3/Cks2/Plk4/Aurka/Wdr90/Plk1/Racgap1/Hmmr/Top2a/Cdk1/Bub1b/Kif22/Ccnb2	h	http://www.broadinstitute.org/gsea/msigdb/cards/H
HALLMARK_IL6_JAK_STAT3_SIGNALING	68	0.463252	1.65529	0.00241979	0.012099	0.00789617	1953	tags=25%, list=14%, signal=22%	A2m/Ccl7/Ccr1/Tnfrsf12a/Csf3r/Socs3/Csf1/Cntfr/Pf4/Csf2ra/Hmox1/Stat3/Osmr/Il2ra/Il17ra/Tlr2/Pik3r5	h	http://www.broadinstitute.org/gsea/msigdb/cards/H
HALLMARK_INFLAMMATORY_RESPONSE	142	0.365409	1.47054	0.00720839	0.0327654	0.0213837	1988	tags=25%, list=14%, signal=22%	Icam4/Ccl7/Ccl2/Timp1/Plaur/Csf3r/Sphk1/Csf1/Ccl5/C5ar1/Cdkn1a/Icosl/Icam1/F3/Slc7a1/Btg2/Ifitm1/Pdpn/Gpr183/Inhba/Irf7/Ptgir/Serpine1/P2ry2/Nmi/Rgs16/Hbegf/Osmr/Ccrl2/Gpc3/Selenos/Msr1/Tlr2/Clec5a/Pik3r5/Edn1	h	http://www.broadinstitute.org/gsea/msigdb/cards/H
HALLMARK_REACTIVE_OXYGEN_SPECIES_PATHWAY	47	0.481077	1.59521	0.0129815	0.0466041	0.0304153	2830	tags=34%, list=21%, signal=27%	Junb/Gpx3/Mgst1/Pfkp/Prdx4/Nqo1/Pdlim1/Stk25/G6pdx/Gclm/Selenos/Mbp/Abcc1/Lsp1/Ftl1/Srxn1	h	http://www.broadinstitute.org/gsea/msigdb/cards/H
HALLMARK_UNFOLDED_PROTEIN_RESPONSE	108	0.380776	1.46932	0.0118996	0.0466041	0.0304153	3556	tags=35%, list=26%, signal=26%	Ccl2/Chac1/Cebpb/Ifit1bl1/Psat1/Eif4ebp1/Hspa5/Pdia6/Xbp1/Tspyl2/Fus/Rrp9/Herpud1/Eef2/Wfs1/Atf3/Parn/Tatdn2/Calr/Stc2/Exosc5/Srprb/Kdelr3/Eif4a1/Srpr/Lsm4/Hsp90b1/Hyou1/Rps14/H2ax/Slc1a4/Dnajb9/Sec31a/Atp6v0d1/Exosc10/Cxxc1/Nhp2/Eif4a3	h	http://www.broadinstitute.org/gsea/msigdb/cards/H
HALLMARK_APOPTOSIS	139	0.355405	1.42673	0.0130492	0.0466041	0.0304153	1121	tags=17%, list=8%, signal=16%	Lgals3/Ier3/Tgfb2/Tnfrsf12a/Timp1/Egr3/Wee1/Isg20/Gstm2/Gadd45b/Cdkn1a/Gpx3/Eno2/Bid/Btg2/Btg3/Hmox1/Rara/Tap1/Bcl2l1/Clu/Bax/Plcb2/Timp3	h	http://www.broadinstitute.org/gsea/msigdb/cards/H
HALLMARK_KRAS_SIGNALING_DN	95	0.38461	1.45422	0.0163476	0.054492	0.0355632	1215	tags=23%, list=9%, signal=21%	Myh7/Tent5c/Arhgdig/Tgfb2/Sstr4/Nudt10/Zbtb16/Nudt11/Fgfr3/Cntfr/Akr1b8/Btg2/Nrip2/Ypel1/Celsr2/Ptgfr/Efhd1/Macroh2a2/Lfng/Cd80/Nr6a1/Tfcp2l1	h	http://www.broadinstitute.org/gsea/msigdb/cards/H
HALLMARK_EPITHELIAL_MESENCHYMAL_TRANSITION	178	0.329694	1.36678	0.0213191	0.0666223	0.0434798	2158	tags=28%, list=16%, signal=24%	Ccn2/Fstl3/Cthrc1/Col8a2/Mmp3/Tnfrsf12a/Timp1/Plaur/Igfbp3/Nnmt/Col12a1/Sfrp1/Gadd45b/Eno2/Spp1/Ptx3/Sdc4/Id2/Cdh6/Comp/Tnc/Slit2/Mfap5/Capg/Inhba/Msx1/Cxcl12/Foxc2/Lamc2/Serpine1/Timp3/Lox/Vcam1/Igfbp4/Efemp2/Fuca1/Pcolce/Mgp/Aplp1/Fbn2/Serpine2/Cap2/Fbln1/Tgfbi/Qsox1/Cdh2/Sgcg/Itga5/Dpysl3	h	http://www.broadinstitute.org/gsea/msigdb/cards/H
