# Supplementary material for: Psychosocial stress exacerbates doxorubicin-induced cardiotoxicity in adult C57BL/6N mice
Source: Research Square preprint supplement (doi:10.21203/rs.3.rs-8491866/v1), 2026-01-08
Supplement: Supplementary file 2 [file e76d1adf3b4ba1f967e39c06.docx]

**RESEARCH ARTICLE | SUPPLEMENTAL MATERIAL-1**

**Methods for Bulk RNA-seq**

**Sample preparation:** Total extracted RNA was subjected to additional clean-up steps using the RNeasy Plus micro kit (Qiagen, Germantown, MD, USA), including the depletion of genomic host DNA. All steps were performed according to the manufacturer’s instructions.

**Sample Quality Assessment:** Total RNA isolates are quantified using a fluorimetric RiboGreen assay. Total RNA integrity is assessed using capillary electrophoresis (e.g. Agilent BioAnalyzer 2100), generating an RNAIntegrity Number (RIN). For samples to pass the initial QC step, they need to quantify higher than 500 ng and have a RIN of 8 or greater. Total RNA samples are then converted to Illumina sequencing libraries.

**Library Creation**: Total RNA samples are converted to Illumina sequencing libraries using Illumina’s TruSeq RNA Sample Preparation Kit (Cat. #RS-122-2001 or RS-122-2002) or Stranded mRNA Sample Preparation Kit (Cat. # RS-122-2101). In summary, the mRNA from a normalized input mass of total RNA is isolated using oligo-dT coated magnetic beads, fragmented and then reverse transcribed into cDNA. The cDNA is blunt-ended, A-tailed and indexed by ligating molecularly barcoded adaptors. Libraries are amplified using 15cycles of PCR. Final library size distribution is validated using capillary electrophoresis and quantified using fluorimetry (PicoGreen) and via Q-PCR. Indexed libraries are then normalized, pooled and size-selected to 320 bp (tight) using the PippinHT instrument.

**Cluster generation and sequencing:** Pooled libraries are denatured and diluted to the appropriate clustering concentration. The libraries are then loaded onto the NovaSeq paired end flow cell and clustering occurs on board the instrument. Once clustering is complete, the sequencing reaction immediately begins using Illumina’s 2-color SBS chemistry. Upon completion of read 1, a 7 base pair index read is performed in the case of single indexed libraries. If dual indexing was used during library preparation, 2 separate 8 or 10 base pair index reads are performed. Finally, the clustered library fragments are re-synthesized in the reverse direction thus producing the template for paired end read 2.

**Primary analysis and de-multiplexing:** Base call (.bcl) files for each cycle of sequencing are generated by Illumina Real Time Analysis (RTA) software. The base call files and run folders are streamed to servers maintained at the Minnesota Supercomputing Institute. Primary analysis and de-multiplexing are performed using Illumina’s bcl-convert v4.0.3. The end result of the bcl-convert workflow is de-multiplexed FASTQ files that are released to client accounts for subsequent analysis by the mapping software and aligner of their own choosing.

**Table 1. Primer sequences used in this study.**

| **Gene** | **Forward Primer (5’ – 3’)** | **Reverse Primer (5’ – 3’)** |
| --- | --- | --- |
| ***Nppa*** | GGAGCCTACGAAGATCCAGC | TCCAATCCTGTCAATCCTACCC |
| ***Nppb*** | AGTCCTTCGGTCTCAAGGCA | CCGATCCGGTCTATCTTGTGC |
| ***Col1a1*** | CTGGCGGTTCAGGTCCAAT | TTCCAGGCAATCCACGAGC |
| ***Myh7*** | TGCAAGGCTCCAGGTCTGAGGGC | GCCAACACCAACCTGTCCAAGTTC |
| ***Sprr1a*** | CAAGGCACCTGAGCCCTGCAA | AGGCTCTGGTGCCTTAGGTTGG |
| ***Lgals3*** | TATCCTGCTGCTGGCCCTTATG | GTTTGCGTTGGGTTTCACTG |
| ***Il-6*** | CTCTGGGAAATCGTGGAAAT | CCAGTTTGGTAGCATCCATC |
| ***TrkB*** | AACGGAGACTACACCCTGATGG | GCAATCACCACCACGGCATA |
| ***Actb*** | TATTGGCAACGAGCGGTTCC | GGCATAGAGGTCTTTACGGATGTC |

**Table 2: Body composition analysis**

| Parameter | Control Saline | | Control DOX | | CSS Saline | | CSS DOX | | DOX effect | | CSS effect | | Interaction effect | |
| --- | --- | --- | --- | --- | --- | --- | --- | --- | --- | --- | --- | --- | --- | --- |
| Mean | SEM | Mean | SEM | Mean | SEM | Mean | SEM | Effect size (%) | P value | Effect size (%) | P value | Effect size (%) | P value |
| Final fat mass (g) | 4.2342 | 0.8594 | 0.5228 | 0.1392 | 2.3344 | 0.2845 | 0.5533 | 0.1892 | 52.22 | **<0.0001** | 6.049 | 0.056 | 6.45 | 0.049 |
| Final fat free mass (g) | 26.9042 | 0.6192 | 23.3528 | 0.7825 | 27.96 | 0.5178 | 24.961 | 0.4575 | 46.65 | **<0.0001** | 7.72 | 0.040 | 0.33 | 0.65 |

Values are presented as mean ± standard error of the mean (SEM) (N=7-11 per group). Statistical significance was determined by two-way ANOVA followed by Tukey’s post-hoc analysis. P<0.05 is considered statistically significant and written in bold and underlines.

**Table 3: Cardiac function measured by trans-thoracic echocardiography in Control, DOX, CSS and CSS DOX treated mice**

| **Parameter** | **Control** | | **DOX** | | **CSS** | | **CSS/DOX** | | **DOX effect** | | **CSS effect** | | **Interaction effect** | |
| --- | --- | --- | --- | --- | --- | --- | --- | --- | --- | --- | --- | --- | --- | --- |
| **Mean** | **SEM** | **Mean** | **SEM** | **Mean** | **SEM** | **Mean** | **SEM** | **Effect size (%)** | **P value** | **Effect size (%)** | **P value** | **Effect size (%)** | **P value** |
| Ejection fraction (%) | 47.164 | 2.505 | 41.564 | 2.412 | 44.667 | 1.122 | 34.233 | 2.697 | 31.78 | **0.001** | 11.94 | **0.034** | 2.89 | 0.28 |
| Fractional shortening (%) | 23.606 | 1.483 | 20.221 | 1.347 | 22.032 | 0.645 | 16.251 | 1.379 | 32.88 | **0.001** | 12.03 | **0.032** | 2.25 | 0.33 |
| Cardiac output (ml/min) | 17.224 | 1.098 | 13.679 | 0.728 | 19.465 | 1.120 | 11.613 | 1.414 | 48.76 | **<0.0001** | 0.01 | 0.93 | 6.96 | 0.063 |
| Stroke volume (ul) | 41.855 | 1.640 | 32.705 | 1.671 | 41.200 | 2.449 | 30.035 | 2.187 | 47.27 | **<0.0001** | 1.27 | 0.44 | 0.47 | 0.64 |
| Heart rate (beats/min) | 409.467 | 9.992 | 422.615 | 25.326 | 489.185 | 7.881 | 380.186 | 23.686 | 16.29 | **0.011** | 2.47 | 0.29 | 26.46 | **0.002** |
| LV mass (mg) | 116.851 | 2.913 | 99.445 | 2.944 | 145.072 | 6.182 | 127.313 | 5.895 | 17.76 | **0.001** | 45.18 | **<0.0001** | 0.00 | 0.97 |
| HW/TL(mg/mm) | 5.579 | 0.102 | 4.720 | 0.116 | 6.719 | 0.211 | 5.390 | 0.120 | 40.48 | **<0.0001** | 27.73 | **<0.0001** | 1.87 | 0.15 |
| LVAW;d(mm) | 0.912 | 0.027 | 0.887 | 0.039 | 1.079 | 0.027 | 0.925 | 0.046 | 14.89 | **0.016** | 19.58 | **0.006** | 7.69 | 0.075 |
| LVAW;s(mm) | 1.209 | 0.053 | 1.145 | 0.047 | 1.405 | 0.054 | 1.195 | 0.083 | 14.03 | **0.029** | 11.32 | **0.049** | 3.91 | 0.23 |
| LVPW;d(mm) | 0.722 | 0.012 | 0.677 | 0.024 | 0.835 | 0.045 | 0.811 | 0.071 | 1.969 | 0.42 | 25.68 | **0.007** | 0.17 | 0.81 |
| LVPW;s(mm) | 0.992 | 0.045 | 0.888 | 0.039 | 1.088 | 0.032 | 0.970 | 0.083 | 14.99 | **0.036** | 9.73 | 0.086 | 0.06 | 0.89 |
| LVID;s (mm) | 3.423 | 0.110 | 3.374 | 0.127 | 3.493 | 0.092 | 3.730 | 0.225 | 1.684 | 0.50 | 8.63 | 0.13 | 3.89 | 0.31 |
| LVID;d (mm) | 4.466 | 0.076 | 4.226 | 0.109 | 4.470 | 0.114 | 4.323 | 0.147 | 11.16 | 0.098 | 0.76 | 0.65 | 0.66 | 0.68 |
| LV Vol;s (ul) | 48.681 | 3.691 | 47.186 | 4.074 | 51.003 | 3.307 | 60.919 | 8.982 | 2.446 | 0.41 | 8.89 | 0.12 | 4.49 | 0.27 |
| LV Vol;d (ul) | 91.062 | 3.539 | 80.188 | 4.840 | 91.609 | 5.482 | 93.752 | 10.461 | 1.824 | 0.49 | 4.76 | 0.26 | 4.06 | 0.3 |
| E/A ratio | 1.592 | 0.040 | 1.735 | 0.135 | 1.763 | 0.136 | 2.498 | 0.527 | 12.43 | 0.065 | 14.08 | 0.050 | 5.64 | 0.204 |
| AET(ms) | 50.415 | 1.096 | 50.511 | 2.221 | 47.243 | 1.349 | 54.571 | 2.688 | 13.04 | 0.052 | 0.19 | 0.80 | 12.37 | 0.058 |
| NFT(ms) | 79.419 | 1.939 | 82.263 | 2.697 | 73.311 | 1.382 | 90.304 | 5.360 | 30.71 | **0.001** | 0.29 | 0.72 | 15.63 | **0.015** |
| IVRT(ms) | 17.023 | 0.760 | 18.985 | 0.954 | 14.369 | 0.528 | 19.946 | 1.629 | 35.54 | **0.0004** | 1.79 | 0.36 | 8.17 | 0.060 |
| IVCT(ms) | 11.718 | 0.507 | 12.745 | 0.471 | 11.943 | 0.727 | 14.528 | 1.500 | 16.66 | **0.033** | 5.15 | 0.22 | 3.10 | 0.34 |
| E-wave deceleration time (ms) | 21.631 | 0.856 | 18.324 | 1.513 | 19.039 | 1.078 | 24.676 | 2.238 | 1.98 | 0.4103 | 5.16 | 0.1888 | 29.18 | **0.003** |

Values are presented as mean ± standard error of the mean (SEM) (N=7-11 per group). Statistical significance was determined by two-way ANOVA followed by Tukey’s post-hoc analysis. P<0.05 is considered statistically significant and written in bold and underlines. LV, left ventricle; HW/TL, Heart weight to tibia length ratio; LVAW;s, LV anterior wall during systole; LVAW;d, LV anterior wall during diastole; LVPW;s, LV posterior wall during systole; LVPW;d, LV posterior wall during diastole; LVID;s (left ventricular internal diameter during systole), LVID;d (left ventricular internal diameter during diastole), LV Vol;s (left ventricular volume during systole), LV Vol;d (left ventricular volume during diastole), E/A ratio (early-to-late mitral inflow velocity ratio), AET (aortic ejection time), NFT (no-flow time), IVRT (isovolumic relaxation time), IVCT (isovolumic contraction time), and E-wave deceleration time. All time-based parameters are reported in milliseconds (ms), and volumes are reported in microliters (µL).

**Table S4: Gene expression by quantitative real-time PCR**

| **Parameter** | **Control** | | **DOX** | | **CSS** | | **CSS/DOX** | | **DOX effect** | | **CSS effect** | | **Interaction effect** | |
| --- | --- | --- | --- | --- | --- | --- | --- | --- | --- | --- | --- | --- | --- | --- |
| **Mean** | **SEM** | **Mean** | **SEM** | **Mean** | **SEM** | **Mean** | **SEM** | **Effect size (%)** | **P value** | **Effect size (%)** | **P value** | **Effect size (%)** | **P value** |
| *Nppa* | 1.012 | 0.083 | 1.938 | 0.171 | 1.927 | 0.409 | 4.963 | 1.855 | 20 | **0.010** | 19.77 | **0.011** | 5.67 | 0.15 |
| *Nppb* | 0.865 | 0.141 | 1.515 | 0.156 | 0.827 | 0.174 | 2.014 | 0.421 | 42.26 | **0.0004** | 2.67 | 0.30 | 3.61 | 0.23 |
| *Myh7* | 0.951 | 0.160 | 4.201 | 0.861 | 1.535 | 0.350 | 4.366 | 1.313 | 44.82 | **0.0002** | 0.68 | 0.59 | 0.21 | 0.76 |
| *Col1a1* | 1.000 | 0.130 | 0.511 | 0.065 | 1.180 | 0.179 | 1.160 | 0.300 | 6.15 | 0.16 | 16.35 | **0.027** | 5.23 | 0.19 |
| *Lgals3* | 1.000 | 0.070 | 1.208 | 0.081 | 1.088 | 0.099 | 2.400 | 0.750 | 18.93 | **0.017** | 13.42 | **0.042** | 9.97 | 0.076 |
| *Il-6* | 0.947 | 0.222 | 2.449 | 0.453 | 2.117 | 0.300 | 6.080 | 1.457 | 34.97 | **0.0002** | 26.99 | **0.0008** | 7.09 | 0.059 |
| *Sprr1a* | 1.000 | 0.320 | 4.904 | 1.541 | 1.910 | 0.526 | 18.750 | 10.685 | 20.34 | **0.013** | 10.29 | 0.068 | 7.91 | 0.10 |

Values are presented as mean ± standard error of the mean (SEM) (N=5-9per group). Statistical significance was determined by two-way ANOVA followed by Tukey’s post-hoc analysis. P<0.05 is considered statistically significant and written in bold and underlines. Nppa (Natriuretic Peptide A), Nppb (Natriuretic Peptide B), Myh7 (Myosin Heavy Chain 7), Col1a1 (Collagen Type I Alpha 1 Chain), Sprr1a (Small Proline-Rich Protein 1A), Lgals3 (Galectin-3), Il-6 (Interleukin-6), and TrkB (Tropomyosin receptor kinase B). Protein expression analysis included: BDNF (Brain-Derived Neurotrophic Factor).

**Figure 1**


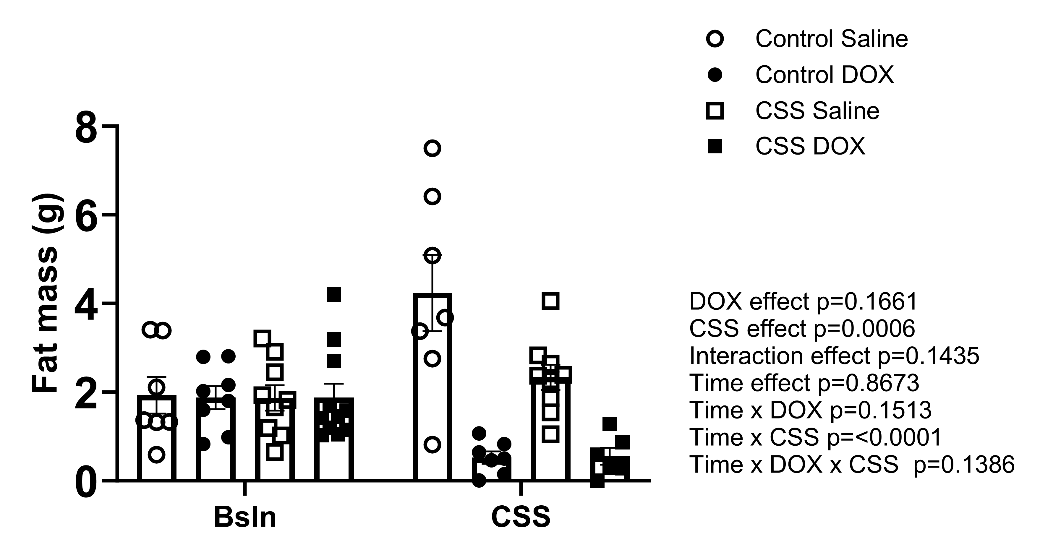


**Figure 2**


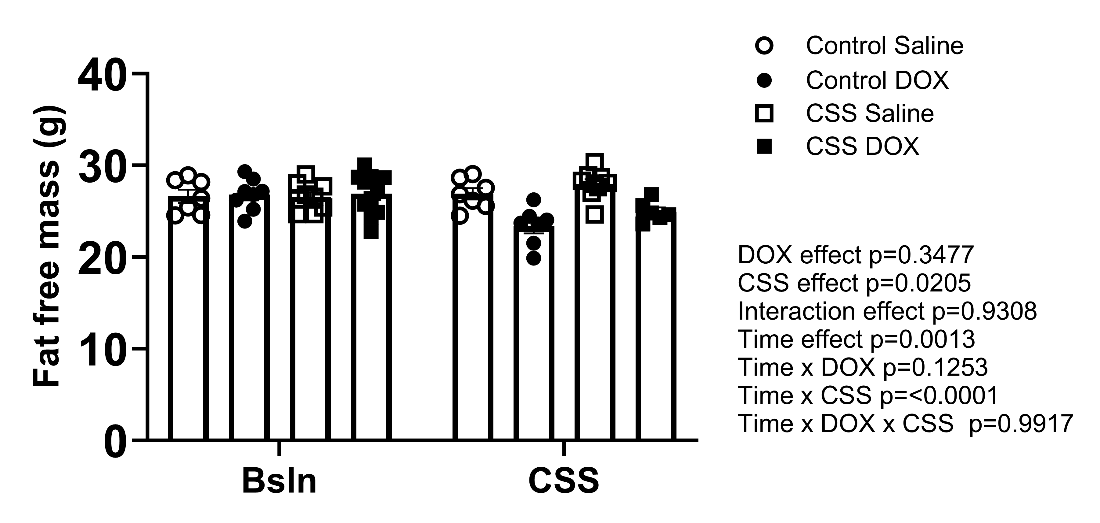


**Supplementary Figure S1** Fat mass and **Supplementary Figure S2** Fat free mass measured at baseline and on CSS Day 25 and analyzed with ANOVA for repeated measures with two-main levels, CSS and DOX (n=7-11 per group), followed by Tukey’s HSD post hoc tests for pairwise comparisons. Values are represented as means ± SEM.
